# Supplementary material for: Wool fabrics decorated with carbon-based conductive ink for low-voltage heaters
Source: Royal Society of Chemistry journal article supplement (doi:10.1039/d1ma00981h), 2022-01-01
Supplement: d1ma00981h1.pdf [file d1ma00981h1.pdf]

## Supporting Information for

# Wool Fabrics Decorated with Carbon-based Conductive Ink for Low-Voltage Heaters

Hamid Souri<sup>1\*</sup> and Debes Bhattacharyya<sup>2</sup>

<sup>1</sup> RaM Group, Faculty of Electrical Engineering, Mathematics and Computer Science,  
University of Twente, 7500 AE, Enschede, The Netherlands

<sup>2</sup> Centre for Advanced Composite Materials, Department of Mechanical Engineering, The  
University of Auckland, 1142, Auckland, New Zealand

\*Corresponding author's E-mail: [souri6889@gmail.com](mailto:souri6889@gmail.com)

This file includes:

**Figures S1-S8, Table S1 and References**

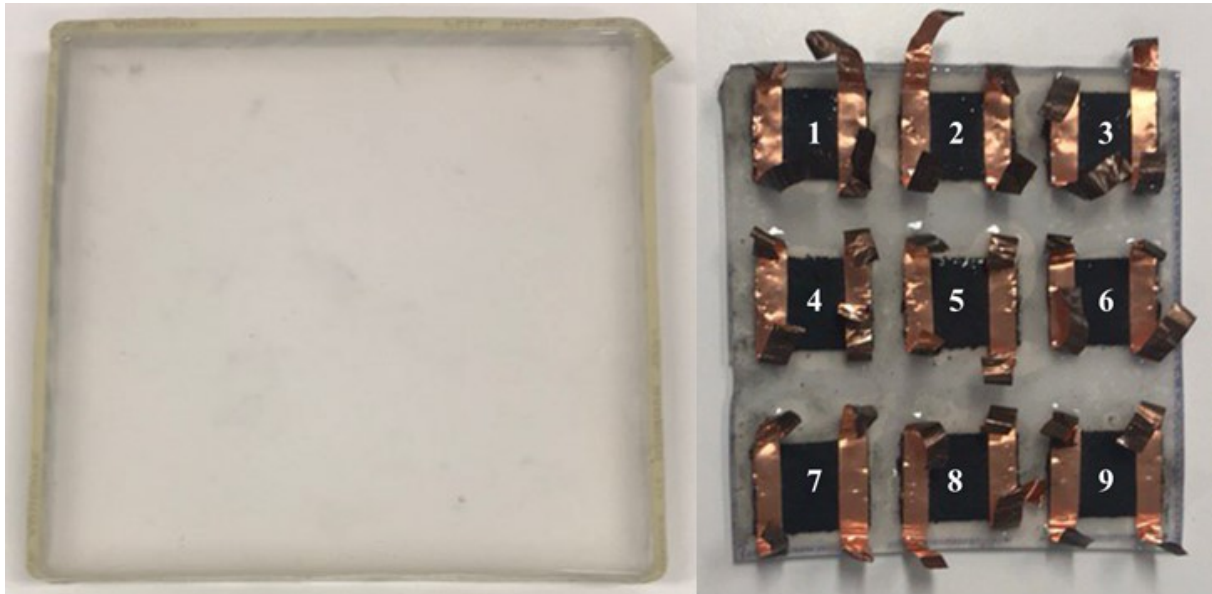

**Figure S1.** View of the substrate and the concept of a large size heating device.

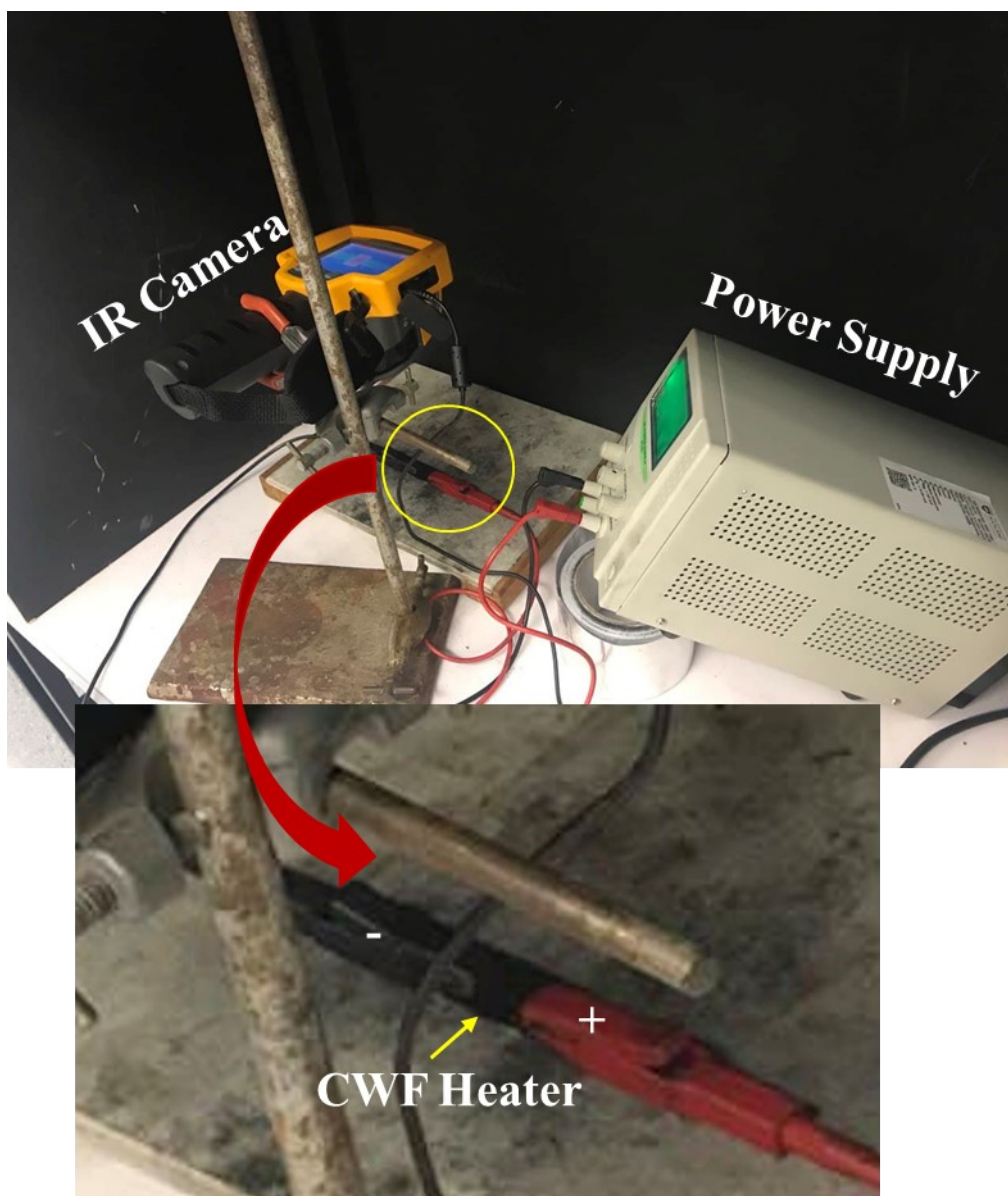

**Figure S2.** The experimental setup for electrothermal characterization of CWF heaters.

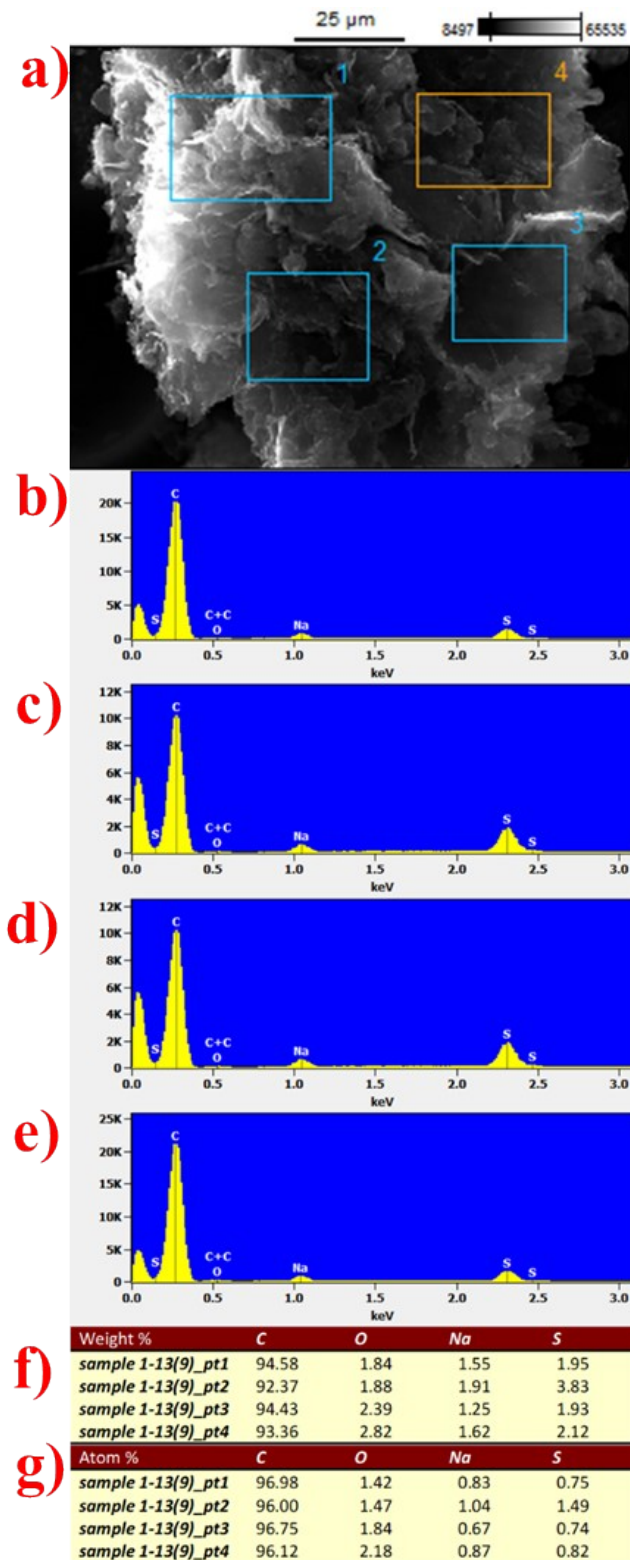

**Figure S3.** EDS analysis for the hybrid of GNPs/CB/SDBS powder; a) SEM image of the powder showing the focused area for EDS analysis, b-e) the EDS spectrum showing the intensity peaks related to the existing elements at areas 1, 2, 3, and 4 respectively. Tables showing the f) weight percentage and g) atomic percentage for each element at those specific areas.

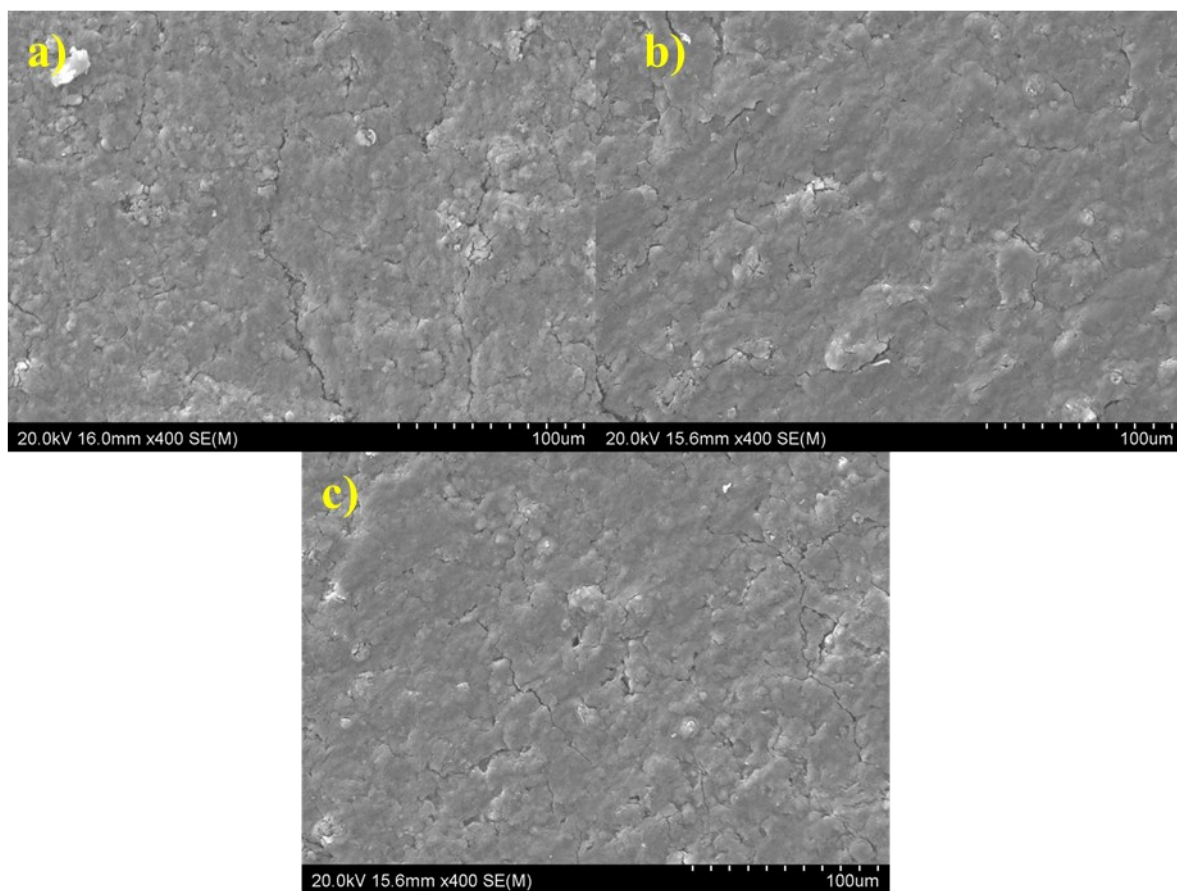

**Figure S4.** SEM images taken from the surface of the heaters after cold-pressing at high resolution indicating the homogenous distribution of GNP and CB particles in the conductive layer.

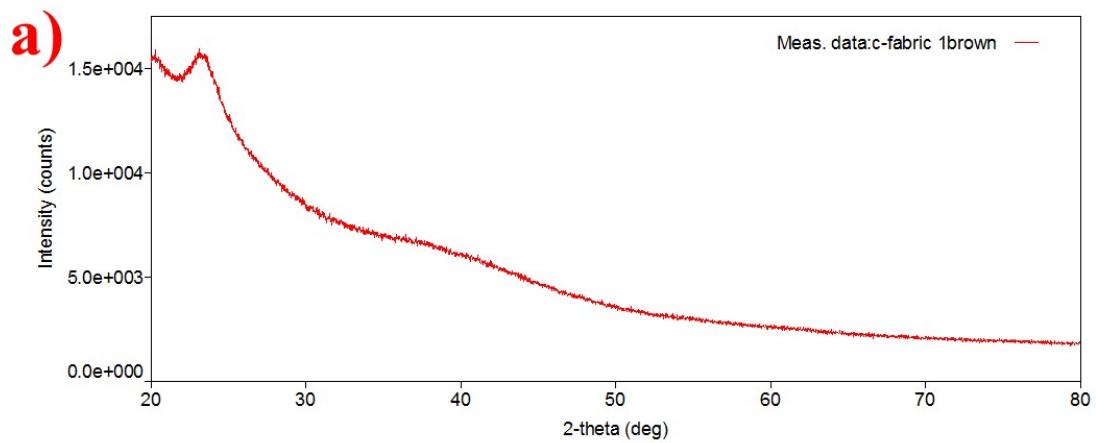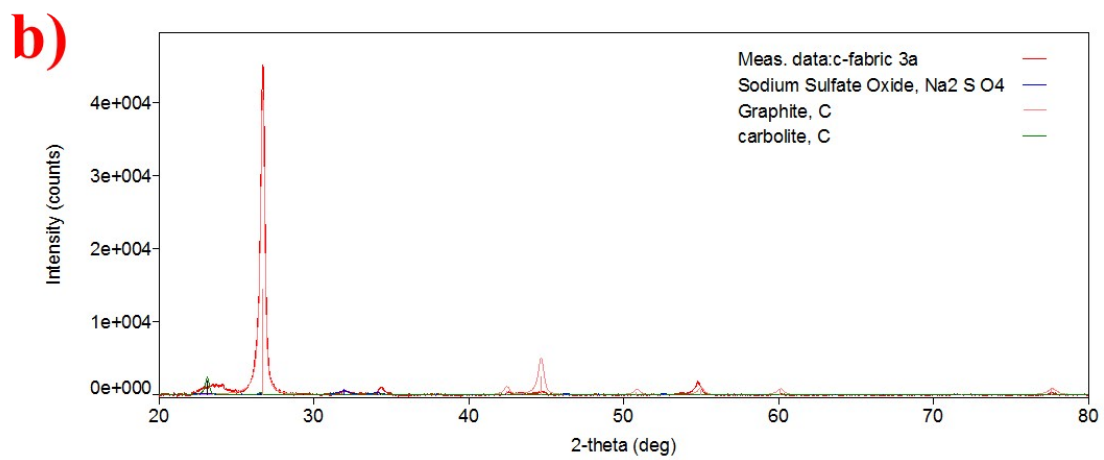

**Figure S5.** XRD spectra of a) neat wool fabric and b) CWF.

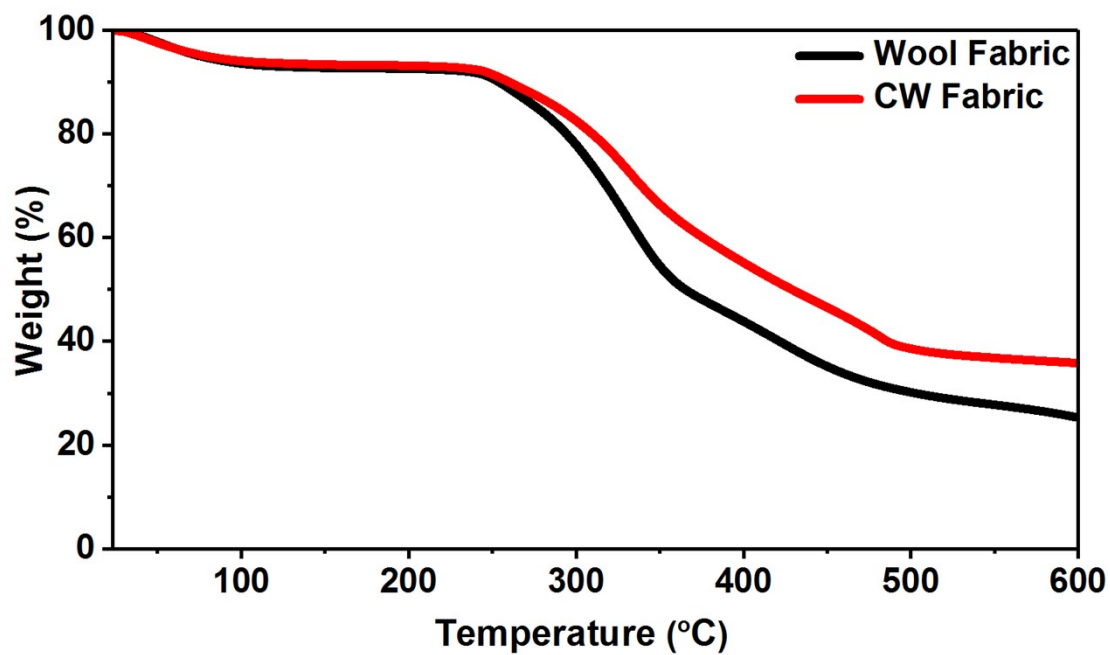

**Figure S6.** TGA thermograms of various fabrics, indicating their thermal behavior up to 600°C.

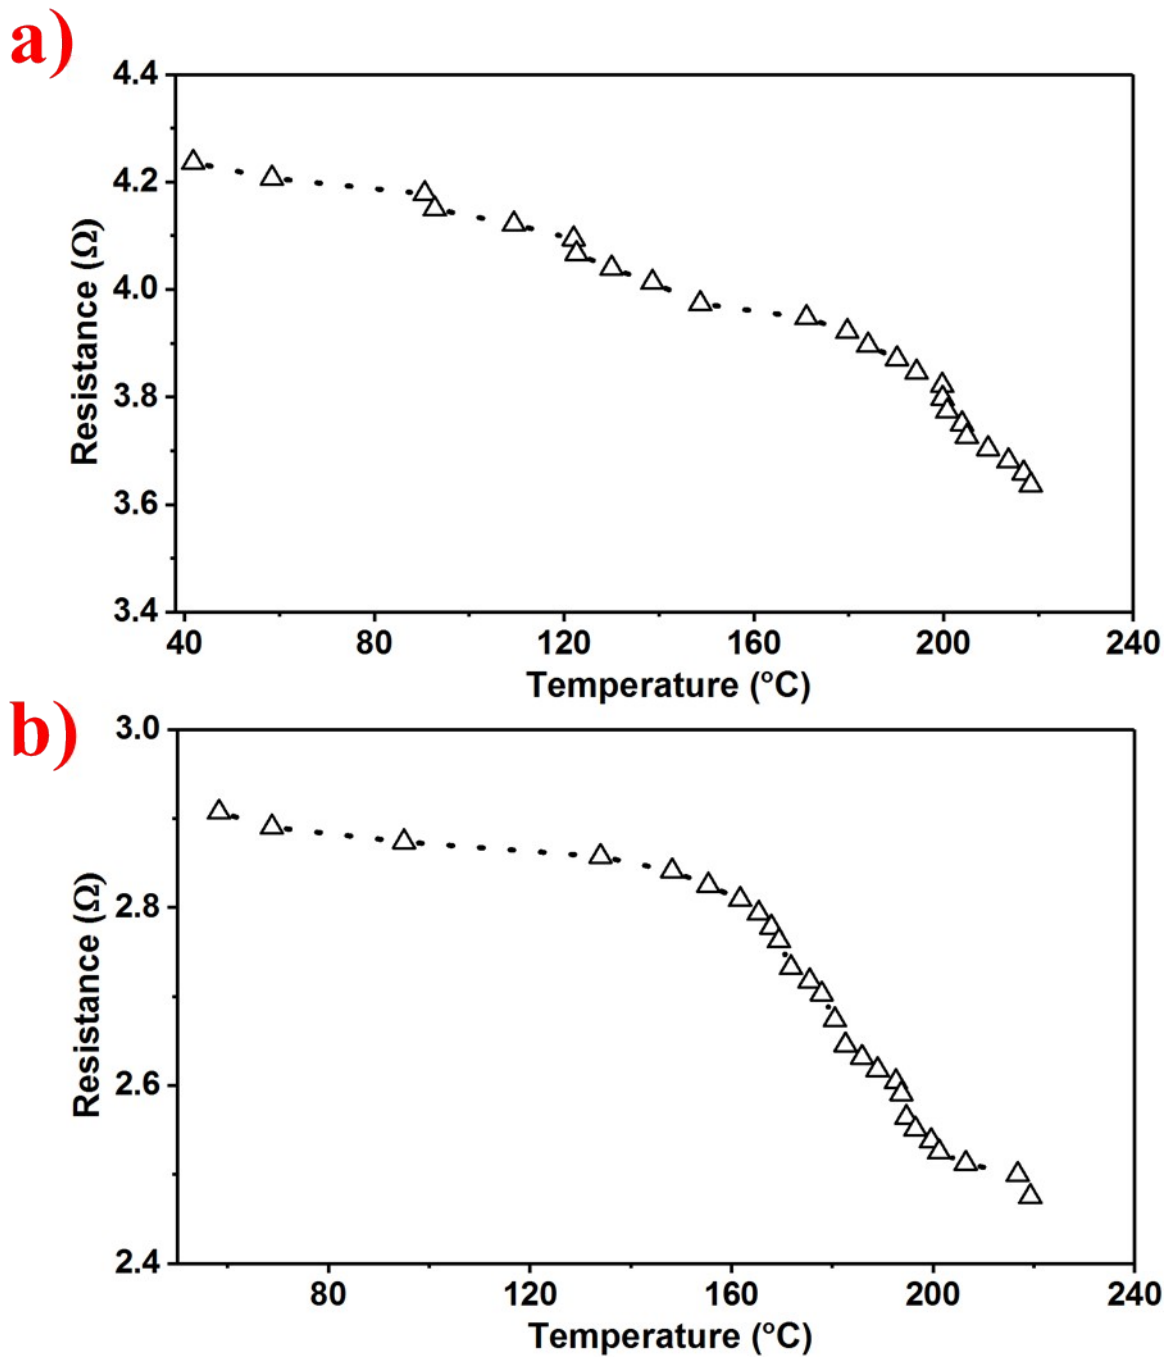

**Figure S7.** Resistance profile of a) a large CWF heater (45mm × 20mm) and b) a small CWF heater (25mm × 20mm-after second cold-pressing cycle) versus temperature.



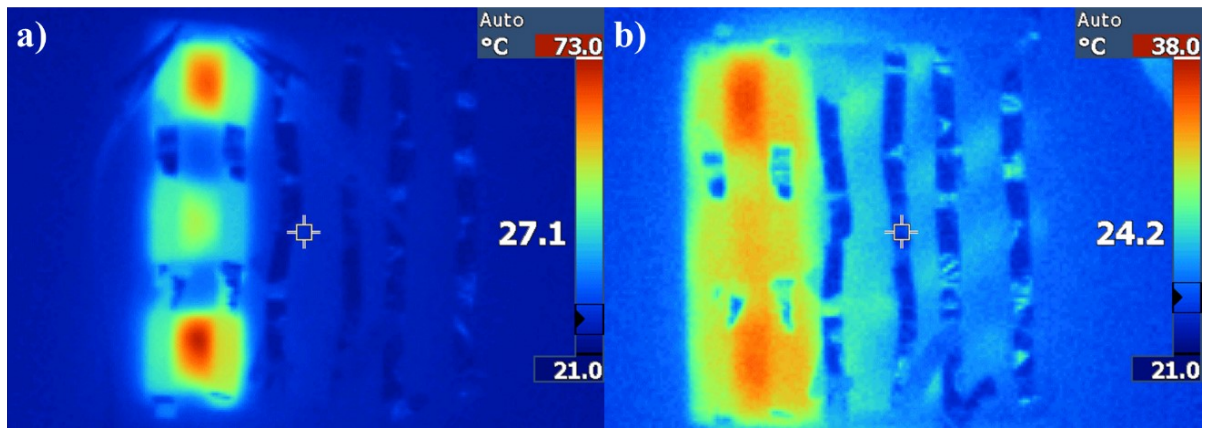

**Figure S8.** Connection of CWF heaters in parallel: observation of temperature distribution on the surface of the demonstrator through IR images when three CWF heaters were linked.

**Table S1.** Comparison of the main performance of our CWF heaters and recently reported ones based on natural materials

| <i>Heaters</i>                                           | <i>Size</i>                | <i>Maximum surface temperature (°C)</i>         | <i>Applied voltage/ Input power</i> |
|----------------------------------------------------------|----------------------------|-------------------------------------------------|-------------------------------------|
|                                                          | 25mm × 20mm                | After first cold-pressing: 238.2 ± 7.16         | up to 4.5V (up to 7.2W)             |
| <b><u>This work</u></b> (GNPs and CB coated wool fabric) | 25mm × 20mm                | After second cold-pressing cycle: 250.66 ± 2.46 | up to 4V                            |
|                                                          | 45mm × 20mm                | After first cold-pressing: 238.26 ± 3.63        | up to 6V (up to 8.5W)               |
| Cotton fabric /PPy [1]                                   | 80mm × 80mm                | 40                                              | 3W                                  |
| Cotton fabric /PPy [2]                                   | 70mm × 70mm                | 48                                              | 9V                                  |
| Cotton fabric/ MnO <sub>2</sub> /rGO [3]                 | 20mm × 20mm                | 36                                              | 15V                                 |
| Cotton fabric/ f-MWCNTs [4]                              | 50mm × 50 mm               | 84                                              | 60V                                 |
| Cotton fabric/PEDOT:PSS [5]                              | 10.8cm <sup>2</sup>        | 99.6                                            | 12V                                 |
| Cotton fabric/ AgNWs [6]                                 | Not reported               | 125                                             | 6V                                  |
| Carbonized modal fabric [7]                              | 1.2cm × 2.6cm              | 150                                             | 3.5V                                |
| Cotton fabric /SWCNTs [8]                                | 10mm × 20mm<br>20mm × 40mm | 96<br>45                                        | 40V<br>40V                          |
| Carbonized modal fabric [9]                              | 1.2cm × 2.6cm              | 150                                             | 3.5V                                |

## References:

- [1] A. Varesano, F. Rombaldoni, and C. Tonetti, Electrically conductive and hydrophobic cotton fabrics by polypyrrole-oleic acid coating, *Fibers Polym.* 14 (2013), pp. 703–9.
- [2] S. Lee and C. H. Park, Electric heated cotton fabrics with durable conductivity and self-cleaning properties, *RSC Adv.* 8 (2018), pp. 31008–18.
- [3] M. Tian, M. Du, L. Qu, K. Zhang, H. Li, S. Zhu, and D. Liu, Conductive reduced graphene oxide/MnO<sub>2</sub> carbonized cotton fabrics with enhanced electro-chemical, -heating, and -mechanical properties, *J. Power Sources* 326 (2016), pp. 428–37.
- [4] M. J. Rahman and T. Mieno Conductive Cotton Textile from Safely Functionalized Carbon Nanotubes, *J. Nanomater.* 16 (2015), pp. 187.
- [5] C. Yeon, G. Kim, J. W. Lim, and S. J. Yun, Highly Conductive PEDOT:PSS Treated by Sodium Dodecyl Sulfate for Stretchable Fabric Heaters, *RSC Adv.* 7 (2017), pp. 5888.
- [6] D. Doganay, S. Coskun, S. P. Genlik, and H. E. Unalan, Silver nanowire decorated heatable textiles, *Nanotechnology* 27 (2016), pp. 435201.
- [7] M. Zhang, C. Wang, X. Liang, Z. Yin, K. Xia, H. Wang, M. Jian, and Y. Zhang, Weft-Knitted Fabric for a Highly Stretchable and Low-Voltage Wearable Heater, *Adv. Electron. Mater.* 3 (2017), pp. 1–8.
- [8] P. Ilanchezhian, A. S. Zakirov, G. M. Kumar, S. U. Yuldashev, H. D. Cho, T. W. Kang, and A. T. Mamadalimov, Highly efficient CNT functionalized cotton fabrics for flexible/wearable heating applications, *RSC Adv.* 5 (2015), pp. 10697–702.
- [9] C. Wang, M. Zhang, K. Xia, X. Gong, H. Wang, Z. Yin, B. Guan, and Y. Zhang, Intrinsically Stretchable and Conductive Textile by a Scalable Process for Elastic Wearable Electronics, *ACS Appl. Mater. Interfaces* 9 (2017), pp. 13331–8.
